# Supplementary material for: Psychiatric treatment conducted via telemedicine versus in-person consultations in mood, anxiety and personality disorders: a protocol for a systematic review and meta-analysis
Source: PubMed Central journal article supplement — BMJ Open. 2022 Sep 28;12(9):e060690. doi: 10.1136/bmjopen-2021-060690 (PMC9528631; doi:10.1136/bmjopen-2021-060690), 2022-09-28
Supplement: bmjopen-2021-060690supp002.pdf [file bmjopen-2021-060690supp002.pdf]

| Search Strategy for: <i>PsycInfo</i> |                                                                               |
|--------------------------------------|-------------------------------------------------------------------------------|
| OVID interface                       |                                                                               |
| #                                    | Searches                                                                      |
| 1                                    | exp Treatment Effectiveness Evaluation/                                       |
| 2                                    | exp Treatment Outcomes/                                                       |
| 3                                    | exp Placebo/                                                                  |
| 4                                    | exp Followup Studies/                                                         |
| 5                                    | placebo*.mp.                                                                  |
| 6                                    | random*.mp.                                                                   |
| 7                                    | comparative stud*.mp.                                                         |
| 8                                    | (clinical adj3 trial*).mp.                                                    |
| 9                                    | (research adj3 design).mp.                                                    |
| 10                                   | (evaluat* adj3 stud*).mp.                                                     |
| 11                                   | (clinical adj3 trial*).mp.                                                    |
| 12                                   | (research adj3 design).mp.                                                    |
| 13                                   | (evaluat* adj3 stud*).mp.                                                     |
| 14                                   | (prospectiv* adj3 stud*).mp.                                                  |
| 15                                   | ((singl* or doubl* or trebl* or tripl*) adj3 (blind* or mask*)).mp.           |
| 16                                   | 1 or 2 or 3 or 4 or 5 or 6 or 7 or 8 or 9 or 10 or 11 or 12 or 13 or 14 or 15 |
| 17                                   | exp Psychiatry/                                                               |
| 18                                   | exp Mental Health/                                                            |
| 19                                   | exp Mental Disorders/                                                         |
| 20                                   | exp Mental Health Services/                                                   |
| 21                                   | mental health counseling.ab,sh,ti,tw.                                         |
| 22                                   | mental health consultation.ab,sh,ti,tw.                                       |
| 23                                   | psychiatric consultation.ab,sh,ti,tw.                                         |
| 24                                   | psychiatric day treatment.ab,sh,ti,tw.                                        |
| 25                                   | mental health care.ab,sh,ti,tw.                                               |
| 26                                   | psychiatric home care.ab,sh,ti,tw.                                            |
| 27                                   | "psychiatric outpatient*".ab,sh,ti,tw.                                        |
| 28                                   | 17 or 18 or 19 or 20 or 21 or 22 or 23 or 24 or 25 or 26 or 27                |
| 29                                   | exp Telemedicine/                                                             |
| 30                                   | exp Telepsychiatry/                                                           |
| 31                                   | exp Videoconferencing/                                                        |
| 32                                   | ehealth.ab,sh,ti,tw.                                                          |
| 33                                   | telecommunication.ab,sh,ti,tw.                                                |
| 34                                   | telehealth.ab,sh,ti,tw.                                                       |
| 35                                   | telemental.ab,sh,ti,tw.                                                       |
| 36                                   | "telepsychiatr*".ab,sh,ti,tw.                                                 |
| 37                                   | "teletherap*".ab,sh,ti,tw.                                                    |
| 38                                   | "videoconferenc*".ab,sh,ti,tw.                                                |
| 39                                   | videophone.ab,sh,ti,tw.                                                       |
| 40                                   | 29 or 30 or 31 or 32 or 33 or 34 or 35 or 36 or 37 or 38 or 39                |
| 41                                   | 28 and 40                                                                     |
| 42                                   | 16 and 41                                                                     |

| <b>Search Strategy for: Embase</b> |                                                                                                                                                                                                                                                                                                                                                                                                                                                                                                                                                                                                                                                                                                                                                                                                                                                                                                                                                                                                                                                                                                                                                                                                                                                                                                                                                                                                                                                                                                                                                                                                                                                                                                                                                                                                                                                                                                                                                                         |
|------------------------------------|-------------------------------------------------------------------------------------------------------------------------------------------------------------------------------------------------------------------------------------------------------------------------------------------------------------------------------------------------------------------------------------------------------------------------------------------------------------------------------------------------------------------------------------------------------------------------------------------------------------------------------------------------------------------------------------------------------------------------------------------------------------------------------------------------------------------------------------------------------------------------------------------------------------------------------------------------------------------------------------------------------------------------------------------------------------------------------------------------------------------------------------------------------------------------------------------------------------------------------------------------------------------------------------------------------------------------------------------------------------------------------------------------------------------------------------------------------------------------------------------------------------------------------------------------------------------------------------------------------------------------------------------------------------------------------------------------------------------------------------------------------------------------------------------------------------------------------------------------------------------------------------------------------------------------------------------------------------------------|
| OVID interface                     |                                                                                                                                                                                                                                                                                                                                                                                                                                                                                                                                                                                                                                                                                                                                                                                                                                                                                                                                                                                                                                                                                                                                                                                                                                                                                                                                                                                                                                                                                                                                                                                                                                                                                                                                                                                                                                                                                                                                                                         |
| #                                  | Searches                                                                                                                                                                                                                                                                                                                                                                                                                                                                                                                                                                                                                                                                                                                                                                                                                                                                                                                                                                                                                                                                                                                                                                                                                                                                                                                                                                                                                                                                                                                                                                                                                                                                                                                                                                                                                                                                                                                                                                |
| 1                                  | psychiatry/ or cultural psychiatry/ or emergency psychiatry/ or forensic psychiatry/ or gerontopsychiatry/ or liaison psychiatry/ or neuropsychiatry/ or psychosomatics/ or social psychiatry/ or telepsychiatry/                                                                                                                                                                                                                                                                                                                                                                                                                                                                                                                                                                                                                                                                                                                                                                                                                                                                                                                                                                                                                                                                                                                                                                                                                                                                                                                                                                                                                                                                                                                                                                                                                                                                                                                                                       |
| 2                                  | exp mental health/                                                                                                                                                                                                                                                                                                                                                                                                                                                                                                                                                                                                                                                                                                                                                                                                                                                                                                                                                                                                                                                                                                                                                                                                                                                                                                                                                                                                                                                                                                                                                                                                                                                                                                                                                                                                                                                                                                                                                      |
| 3                                  | mental disease/ or addiction/ or adjustment disorder/ or anxiety disorder/ or autism/ or behavior disorder/ or dissociative disorder/ or emotional disorder/ or mood disorder/ or neurosis/ or personality disorder/ or psychosis/ or schizophrenia spectrum disorder/                                                                                                                                                                                                                                                                                                                                                                                                                                                                                                                                                                                                                                                                                                                                                                                                                                                                                                                                                                                                                                                                                                                                                                                                                                                                                                                                                                                                                                                                                                                                                                                                                                                                                                  |
| 4                                  | exp mental health service/                                                                                                                                                                                                                                                                                                                                                                                                                                                                                                                                                                                                                                                                                                                                                                                                                                                                                                                                                                                                                                                                                                                                                                                                                                                                                                                                                                                                                                                                                                                                                                                                                                                                                                                                                                                                                                                                                                                                              |
| 5                                  | home mental health care/                                                                                                                                                                                                                                                                                                                                                                                                                                                                                                                                                                                                                                                                                                                                                                                                                                                                                                                                                                                                                                                                                                                                                                                                                                                                                                                                                                                                                                                                                                                                                                                                                                                                                                                                                                                                                                                                                                                                                |
| 6                                  | "psychiatric consultation*".ab,kw,ti,tw.                                                                                                                                                                                                                                                                                                                                                                                                                                                                                                                                                                                                                                                                                                                                                                                                                                                                                                                                                                                                                                                                                                                                                                                                                                                                                                                                                                                                                                                                                                                                                                                                                                                                                                                                                                                                                                                                                                                                |
| 7                                  | mental health counseling.ab,kw,ti,tw.                                                                                                                                                                                                                                                                                                                                                                                                                                                                                                                                                                                                                                                                                                                                                                                                                                                                                                                                                                                                                                                                                                                                                                                                                                                                                                                                                                                                                                                                                                                                                                                                                                                                                                                                                                                                                                                                                                                                   |
| 8                                  | psychiatric day treatment.ab,kw,ti,tw.                                                                                                                                                                                                                                                                                                                                                                                                                                                                                                                                                                                                                                                                                                                                                                                                                                                                                                                                                                                                                                                                                                                                                                                                                                                                                                                                                                                                                                                                                                                                                                                                                                                                                                                                                                                                                                                                                                                                  |
| 9                                  | mental health care.ab,kw,ti,tw.                                                                                                                                                                                                                                                                                                                                                                                                                                                                                                                                                                                                                                                                                                                                                                                                                                                                                                                                                                                                                                                                                                                                                                                                                                                                                                                                                                                                                                                                                                                                                                                                                                                                                                                                                                                                                                                                                                                                         |
| 10                                 | psychiatric home care.ab,kw,ti,tw.                                                                                                                                                                                                                                                                                                                                                                                                                                                                                                                                                                                                                                                                                                                                                                                                                                                                                                                                                                                                                                                                                                                                                                                                                                                                                                                                                                                                                                                                                                                                                                                                                                                                                                                                                                                                                                                                                                                                      |
| 11                                 | psychiatric outpatient.ab,kw,ti,tw.                                                                                                                                                                                                                                                                                                                                                                                                                                                                                                                                                                                                                                                                                                                                                                                                                                                                                                                                                                                                                                                                                                                                                                                                                                                                                                                                                                                                                                                                                                                                                                                                                                                                                                                                                                                                                                                                                                                                     |
| 12                                 | "psychiatric outpatient*".ab,kw,ti,tw.                                                                                                                                                                                                                                                                                                                                                                                                                                                                                                                                                                                                                                                                                                                                                                                                                                                                                                                                                                                                                                                                                                                                                                                                                                                                                                                                                                                                                                                                                                                                                                                                                                                                                                                                                                                                                                                                                                                                  |
| 13                                 | mental health home care.ab,ao,kw,ti,tw.                                                                                                                                                                                                                                                                                                                                                                                                                                                                                                                                                                                                                                                                                                                                                                                                                                                                                                                                                                                                                                                                                                                                                                                                                                                                                                                                                                                                                                                                                                                                                                                                                                                                                                                                                                                                                                                                                                                                 |
| 14                                 | 1 or 2 or 3 or 4 or 5 or 6 or 7 or 8 or 9 or 10 or 11 or 12 or 13                                                                                                                                                                                                                                                                                                                                                                                                                                                                                                                                                                                                                                                                                                                                                                                                                                                                                                                                                                                                                                                                                                                                                                                                                                                                                                                                                                                                                                                                                                                                                                                                                                                                                                                                                                                                                                                                                                       |
| 15                                 | telepsychiatry/                                                                                                                                                                                                                                                                                                                                                                                                                                                                                                                                                                                                                                                                                                                                                                                                                                                                                                                                                                                                                                                                                                                                                                                                                                                                                                                                                                                                                                                                                                                                                                                                                                                                                                                                                                                                                                                                                                                                                         |
| 16                                 | teleconsultation/ or telediagnosis/ or telemonitoring/ or telepathology/ or telepsychiatry/ or teleradiotherapy/ or telerehabilitation/ or teletherapy/                                                                                                                                                                                                                                                                                                                                                                                                                                                                                                                                                                                                                                                                                                                                                                                                                                                                                                                                                                                                                                                                                                                                                                                                                                                                                                                                                                                                                                                                                                                                                                                                                                                                                                                                                                                                                 |
| 17                                 | telehealth/                                                                                                                                                                                                                                                                                                                                                                                                                                                                                                                                                                                                                                                                                                                                                                                                                                                                                                                                                                                                                                                                                                                                                                                                                                                                                                                                                                                                                                                                                                                                                                                                                                                                                                                                                                                                                                                                                                                                                             |
| 18                                 | telecommunication/ or telemedicine/ or teleconsultation/ or telediagnosis/ or telepsychiatry/ or telerehabilitation/ or teletherapy/                                                                                                                                                                                                                                                                                                                                                                                                                                                                                                                                                                                                                                                                                                                                                                                                                                                                                                                                                                                                                                                                                                                                                                                                                                                                                                                                                                                                                                                                                                                                                                                                                                                                                                                                                                                                                                    |
| 19                                 | videoconferencing/                                                                                                                                                                                                                                                                                                                                                                                                                                                                                                                                                                                                                                                                                                                                                                                                                                                                                                                                                                                                                                                                                                                                                                                                                                                                                                                                                                                                                                                                                                                                                                                                                                                                                                                                                                                                                                                                                                                                                      |
| 20                                 | "videoconferenc*".ab,ao,kw,ti,tw.                                                                                                                                                                                                                                                                                                                                                                                                                                                                                                                                                                                                                                                                                                                                                                                                                                                                                                                                                                                                                                                                                                                                                                                                                                                                                                                                                                                                                                                                                                                                                                                                                                                                                                                                                                                                                                                                                                                                       |
| 21                                 | videophone.ab,ao,kw,ti,tw.                                                                                                                                                                                                                                                                                                                                                                                                                                                                                                                                                                                                                                                                                                                                                                                                                                                                                                                                                                                                                                                                                                                                                                                                                                                                                                                                                                                                                                                                                                                                                                                                                                                                                                                                                                                                                                                                                                                                              |
| 22                                 | telehealth.ab,ao,kw,ti,tw.                                                                                                                                                                                                                                                                                                                                                                                                                                                                                                                                                                                                                                                                                                                                                                                                                                                                                                                                                                                                                                                                                                                                                                                                                                                                                                                                                                                                                                                                                                                                                                                                                                                                                                                                                                                                                                                                                                                                              |
| 23                                 | telemental.ab,ao,kw,ti,tw.                                                                                                                                                                                                                                                                                                                                                                                                                                                                                                                                                                                                                                                                                                                                                                                                                                                                                                                                                                                                                                                                                                                                                                                                                                                                                                                                                                                                                                                                                                                                                                                                                                                                                                                                                                                                                                                                                                                                              |
| 24                                 | ehealth.ab,ao,kw,ti,tw.                                                                                                                                                                                                                                                                                                                                                                                                                                                                                                                                                                                                                                                                                                                                                                                                                                                                                                                                                                                                                                                                                                                                                                                                                                                                                                                                                                                                                                                                                                                                                                                                                                                                                                                                                                                                                                                                                                                                                 |
| 25                                 | "teletherap*".ab,ao,kw,ti,tw.                                                                                                                                                                                                                                                                                                                                                                                                                                                                                                                                                                                                                                                                                                                                                                                                                                                                                                                                                                                                                                                                                                                                                                                                                                                                                                                                                                                                                                                                                                                                                                                                                                                                                                                                                                                                                                                                                                                                           |
| 26                                 | telecommunication.ab,ao,kw,ti,tw.                                                                                                                                                                                                                                                                                                                                                                                                                                                                                                                                                                                                                                                                                                                                                                                                                                                                                                                                                                                                                                                                                                                                                                                                                                                                                                                                                                                                                                                                                                                                                                                                                                                                                                                                                                                                                                                                                                                                       |
| 27                                 | 15 or 16 or 17 or 18 or 19 or 20 or 21 or 22 or 23 or 24 or 25 or 26                                                                                                                                                                                                                                                                                                                                                                                                                                                                                                                                                                                                                                                                                                                                                                                                                                                                                                                                                                                                                                                                                                                                                                                                                                                                                                                                                                                                                                                                                                                                                                                                                                                                                                                                                                                                                                                                                                    |
| 28                                 | 14 and 27                                                                                                                                                                                                                                                                                                                                                                                                                                                                                                                                                                                                                                                                                                                                                                                                                                                                                                                                                                                                                                                                                                                                                                                                                                                                                                                                                                                                                                                                                                                                                                                                                                                                                                                                                                                                                                                                                                                                                               |
| 29                                 | (Randomized controlled trial/ or Controlled clinical study/ or random\$.ti,ab. or randomization/ or intermethod comparison/ or placebo.ti,ab. or (compare or compared or comparison).ti. or ((evaluated or evaluate or evaluating or assessed or assess) and (compare or compared or comparing or comparison)).ab. or (open adj label).ti,ab. or ((double or single or doubly or singly) adj (blind or blinded or blindly)).ti,ab. or double blind procedure/ or parallel group\$1.ti,ab. or (crossover or cross over).ti,ab. or ((assign\$ or match or matched or allocation) adj5 (alternate or group\$1 or intervention\$1 or patient\$1 or subject\$1 or participant\$1)).ti,ab. or (assigned or allocated).ti,ab. or (controlled adj7 (study or design or trial)).ti,ab. or (volunteer or volunteers).ti,ab. or human experiment/ or trial.ti.) not (((random\$ adj sampl\$ adj7 ("cross section\$" or questionnaire\$1 or survey\$ or database\$1)).ti,ab. not (comparative study/ or controlled study/ or randomi?ed controlled.ti,ab. or randomly assigned.ti,ab.)) or (Cross-sectional study/ not (randomized controlled trial/ or controlled clinical study/ or controlled study/ or randomi?ed controlled.ti,ab. or control group\$1.ti,ab.)) or (((case adj control\$) and random\$) not randomi?ed controlled).ti,ab. or (Systematic review not (trial or study)).ti. or (nonrandom\$ not random\$).ti,ab. or "Random field\$.ti,ab. or (random cluster adj3 sampl\$).ti,ab. or ((review.ab. and review.pt.) not trial.ti.) or ("we searched".ab. and (review.ti. or review.pt.)) or "update review".ab. or (databases adj4 searched).ab. or ((rat or rats or mouse or mice or swine or porcine or murine or sheep or lambs or pigs or piglets or rabbit or rabbits or cat or cats or dog or dogs or cattle or bovine or monkey or monkeys or trout or marmoset\$1).ti. and animal experiment/) or (Animal experiment/ not (human experiment/ or human/))) |
| 30                                 | 28 and 29                                                                                                                                                                                                                                                                                                                                                                                                                                                                                                                                                                                                                                                                                                                                                                                                                                                                                                                                                                                                                                                                                                                                                                                                                                                                                                                                                                                                                                                                                                                                                                                                                                                                                                                                                                                                                                                                                                                                                               |

|                                                                                                                                                                                                                                                                                                                                                                                                                                                                                                                                                                                                                                                                                                                                                                                                                                                                                                                                                                                                                                                                                                                                                                                                                                                                                                                                                                                                                                                                 |
|-----------------------------------------------------------------------------------------------------------------------------------------------------------------------------------------------------------------------------------------------------------------------------------------------------------------------------------------------------------------------------------------------------------------------------------------------------------------------------------------------------------------------------------------------------------------------------------------------------------------------------------------------------------------------------------------------------------------------------------------------------------------------------------------------------------------------------------------------------------------------------------------------------------------------------------------------------------------------------------------------------------------------------------------------------------------------------------------------------------------------------------------------------------------------------------------------------------------------------------------------------------------------------------------------------------------------------------------------------------------------------------------------------------------------------------------------------------------|
| <b>Search Strategy for: Medline</b><br>Pubmed Interface                                                                                                                                                                                                                                                                                                                                                                                                                                                                                                                                                                                                                                                                                                                                                                                                                                                                                                                                                                                                                                                                                                                                                                                                                                                                                                                                                                                                         |
| <b>Query</b>                                                                                                                                                                                                                                                                                                                                                                                                                                                                                                                                                                                                                                                                                                                                                                                                                                                                                                                                                                                                                                                                                                                                                                                                                                                                                                                                                                                                                                                    |
| <pre> (((((((trial [ti]) OR (randomly [tiab])) OR (clinical trials as topic [mesh: noexp])) OR (placebo [tiab])) OR (randomized [tiab])) OR (controlled clinical trial [pt])) OR (randomized controlled trial [pt])) NOT (animals [mh] NOT humans [mh]))  AND (("Psychiatry"[MeSH Terms] OR "Mental Disorders"[MeSH Terms] OR "Mental Health Services"[MeSH Terms] OR "Mental Health"[MeSH Terms] OR ("mental health counseling"[Title/Abstract] OR "mental health consultation"[Title/Abstract] OR "psychiatric consultation*" [Title/Abstract] OR "psychiatric day treatment"[Title/Abstract] OR "mental health care"[Title/Abstract] OR "psychiatric home care"[Title/Abstract] OR "psychiatric outpatient*" [Title/Abstract] OR "community mental health"[Title/Abstract]))  AND ("Telemedicine"[MeSH Terms] OR "Videoconferencing"[MeSH Terms] OR "Remote Consultation"[MeSH Terms] OR ("e- health"[Title/Abstract] OR "telecare"[Title/Abstract] OR "teleconsultation*" [Title/Abstract] OR "telehome"[Title/Abstract] OR "telemedic*" [Title/Abstract] OR "telepsychiatr*" [Title/Abstract] OR "telemental"[Title/Abstract] OR "televideo"[Title/Abstract] OR "videoconferenc*" [Title/Abstract] OR "videophone"[Title/Abstract] OR "telehealth"[Title/Abstract] OR "telemental"[Title/Abstract] OR "ehealth"[Title/Abstract] OR "video conferencing"[Title/Abstract] OR "telecommunication*" [Title/Abstract] OR "teletherapy"[Title/Abstract])) </pre> |

| <b>Search Strategy for: Web Of Science</b><br>Clarivate interface |                                                                                                                                                                                                                                                                   |
|-------------------------------------------------------------------|-------------------------------------------------------------------------------------------------------------------------------------------------------------------------------------------------------------------------------------------------------------------|
| #                                                                 | Searches                                                                                                                                                                                                                                                          |
| 1                                                                 | (Psychiatr* OR (mental NEAR (health OR disorder* OR ill*)) ) OR (counseling NEAR psychology) OR (mental NEAR (counseling OR consultation*)) OR "psychiatric consultation*" OR "psychiatric day treatment" OR "psychiatric home care" OR "mental health service*") |
| 2                                                                 | (e-health OR telecare OR teleconsultation* OR telehome OR telemedic* OR telepsych* OR telemental* OR televideo* OR videoconference* OR videophone OR telehealth OR ehealth OR "video conferencing" OR Telecommunication* OR teletherap* OR teleconference*)       |
| 3                                                                 | 2 AND #1                                                                                                                                                                                                                                                          |
| 4                                                                 | TS=(randomised OR randomized OR randomisation OR randomisation OR placebo* OR (random* AND (allocat* OR assign*))) OR (blind* AND (single OR double OR treble OR triple))                                                                                         |
| 5                                                                 | #4 AND #3                                                                                                                                                                                                                                                         |

| <b>Search Strategy for: Cinahl</b> |                                                                                                                                                                |
|------------------------------------|----------------------------------------------------------------------------------------------------------------------------------------------------------------|
| EBSCOhost interface                |                                                                                                                                                                |
| #                                  | Searches                                                                                                                                                       |
| S55                                | S31 AND S54 Expanders - Apply equivalent subjects                                                                                                              |
| S54                                | S53 NOT S52 Expanders - Apply equivalent subjects                                                                                                              |
| S53                                | S32 OR S33 OR S34 OR S35 OR S36 OR S37 OR S38 OR S39 OR S40 OR S41 OR S42 OR S43 OR S44 OR S45 OR S46 Expanders - Apply equivalent subjects                    |
| S52                                | S50 NOT S51 Expanders - Apply equivalent subjects                                                                                                              |
| S51                                | MH (human) Expanders - Apply equivalent subjects                                                                                                               |
| S50                                | S47 OR S48 OR S49 Expanders - Apply equivalent subjects                                                                                                        |
| S49                                | TI (animal model*) Expanders - Apply equivalent subjects                                                                                                       |
| S48                                | MH (animal studies) Expanders - Apply equivalent subjects                                                                                                      |
| S47                                | MH animals+ Expanders - Apply equivalent subjects                                                                                                              |
| S46                                | AB (cluster W3 RCT) Expanders - Apply equivalent subjects                                                                                                      |
| S45                                | MH (crossover design) OR MH (comparative studies) Expanders - Apply equivalent subjects                                                                        |
| S44                                | AB (control W5 group) Expanders - Apply equivalent subjects                                                                                                    |
| S43                                | PT (randomized controlled trial) Expanders - Apply equivalent subjects                                                                                         |
| S42                                | MH (placebos) Expanders - Apply equivalent subjects                                                                                                            |
| S41                                | MH (sample size) AND AB (assigned OR allocated OR control) Expanders -Apply equivalent subjects                                                                |
| S40                                | TI (trial) Expanders - Apply equivalent subjects                                                                                                               |
| S39                                | AB (random*) Expanders - Apply equivalent subjects                                                                                                             |
| S38                                | TI (randomised OR randomized) Expanders - Apply equivalent subjects                                                                                            |
| S37                                | MH cluster sample Expanders - Apply equivalent subjects                                                                                                        |
| S36                                | MH pretest-posttest design Expanders - Apply equivalent subjects                                                                                               |
| S35                                | MH random assignment Expanders - Apply equivalent subjects                                                                                                     |
| S34                                | MH single-blind studies Expanders - Apply equivalent subjects                                                                                                  |
| S33                                | MH double-blind studies Expanders - Apply equivalent subjects                                                                                                  |
| S32                                | MH randomized controlled trials Expanders - Apply equivalent subjects                                                                                          |
| S31                                | S29 AND S30 Expanders - Apply equivalent subjects                                                                                                              |
| S30                                | S12 OR S13 OR S14 OR S15 OR S16 OR S17 OR S18 OR S19 OR S20 OR S21 OR S22 OR S23 OR S24 OR S25 OR S26 OR S27 OR S28 Expanders - Apply equivalent subjects      |
| S29                                | S1 OR S2 OR S3 OR S4 OR S5 OR S6 OR S7 OR S8 OR S9 OR S10 OR S11 Expanders - Apply equivalent subjects                                                         |
| S28                                | AB teleconference OR TI teleconference Expanders - Apply equivalent subjects                                                                                   |
| S27                                | AB teletherapy OR TI teletherapy Expanders - Apply equivalent subjects                                                                                         |
| S26                                | AB telemental health OR TI telemental health Expanders - Apply equivalent subjects                                                                             |
| S25                                | AB videophone OR TI videophone Expanders - Apply equivalent subjects                                                                                           |
| S24                                | AB videoconference OR TI videoconference Expanders - Apply equivalent subjects                                                                                 |
| S23                                | AB televideo OR TI televideo Expanders - Apply equivalent subjects                                                                                             |
| S22                                | AB telemental OR TI telemental Expanders - Apply equivalent subjects                                                                                           |
| S21                                | AB telepsychiatric OR TI telepsychiatric Expanders - Apply equivalent subjects                                                                                 |
| S20                                | AB telemedical OR TI telemedical Expanders - Apply equivalent subjects                                                                                         |
| S19                                | AB telehome OR TI telehome Expanders - Apply equivalent subjects                                                                                               |
| S18                                | AB telecare OR TI telecare Expanders - Apply equivalent subjects                                                                                               |
| S17                                | AB ehealth OR TI ehealth Expanders - Apply equivalent subjects                                                                                                 |
| S16                                | AB e-health OR TI e-health Expanders - Apply equivalent subjects                                                                                               |
| S15                                | (MH "Telepsychiatry") OR (MH "Telerehabilitation") Expanders - Apply equivalent subjects                                                                       |
| S14                                | (MH "Telemedicine+") OR (MH "Telenursing") Expanders - Apply equivalent subjects                                                                               |
| S13                                | (MH "Remote Consultation") Expanders - Apply equivalent subjects                                                                                               |
| S12                                | (MH "Teleconferencing") OR (MH "Telepsychiatry") OR (MH "Telenursing") OR (MH "Videoconferencing+") OR (MH "Telehealth") Expanders - Apply equivalent subjects |
| S11                                | AB psychiatric day treatment OR TI psychiatric day treatment Expanders                                                                                         |
| S10                                | AB mental health consultation OR TI mental health consultation Expanders - Apply equivalent subjects                                                           |
| S9                                 | AB psychiatric consultation OR TI psychiatric consultation Expanders - Apply equivalent subjects                                                               |
| S8                                 | AB counseling psychology OR TI counseling psychology Expanders - Apply equivalent subjects                                                                     |
| S7                                 | AB mental health counseling OR TI mental health counseling Expanders - Apply equivalent subjects                                                               |
| S6                                 | (MH "Psychiatric Home Care") Expanders - Apply equivalent subjects                                                                                             |
| S5                                 | (MH "Community Mental Health Services+") Expanders - Apply equivalent subjects                                                                                 |
| S4                                 | (MH "Psychiatric Patients+") OR (MH "Psychiatric Units") OR (MH "Hospitals, Psychiatric") Expanders - Apply equivalent subjects                                |
| S3                                 | (MH "Mental Disorders+") Expanders - Apply equivalent subjects                                                                                                 |
| S2                                 | (MH "Mental Health Services") Expanders - Apply equivalent subjects                                                                                            |
| S1                                 | (MH "Psychiatry+") Expanders - Apply equivalent subjects                                                                                                       |

**References for RCT filters applied in the search strategies:**

Pupmed, Embase and Cinahl[1]

Web of science[2]

PsycInfo [3]

- [1] W. L. Lefebvre C, Glanville J, Briscoe S, Littlewood A, Marshall C, Metzendorf M-I, Noel-Storr A, Rader T, Shokraneh F, Thomas J, "4.S1 Technical Supplement to Chapter 4: Searching for and selecting studies | Cochrane Training," 2021. <https://training.cochrane.org/handbook/current/chapter-04-technical-supplement-searching-and-selecting-studies> (accessed Aug. 29, 2021).
- [2] "Searching for studies | Cochrane Ear, Nose and Throat." <https://ent.cochrane.org/resources/searching-studies> (accessed Aug. 29, 2021).
- [3] E. Mccaughan, K. Parahoo, I. Hueter, and L. Northouse, "Online support groups for women with breast cancer," *Cochrane Database Syst. Rev.*, vol. 2015, no. 4, Apr. 2015, doi: 10.1002/14651858.CD011652/EPDF/FULL.
